# Supplementary material for: Population structure of five native sheep breeds of Sweden estimated with high density SNP genotypes
Source: PubMed Central journal article supplement (PMC7060653; doi:10.1186/s12863-020-0827-8), 2020-03-06
Supplement: 12863_2020_827_MOESM1_ESM.pdf [file 12863_2020_827_MOESM1_ESM.pdf]

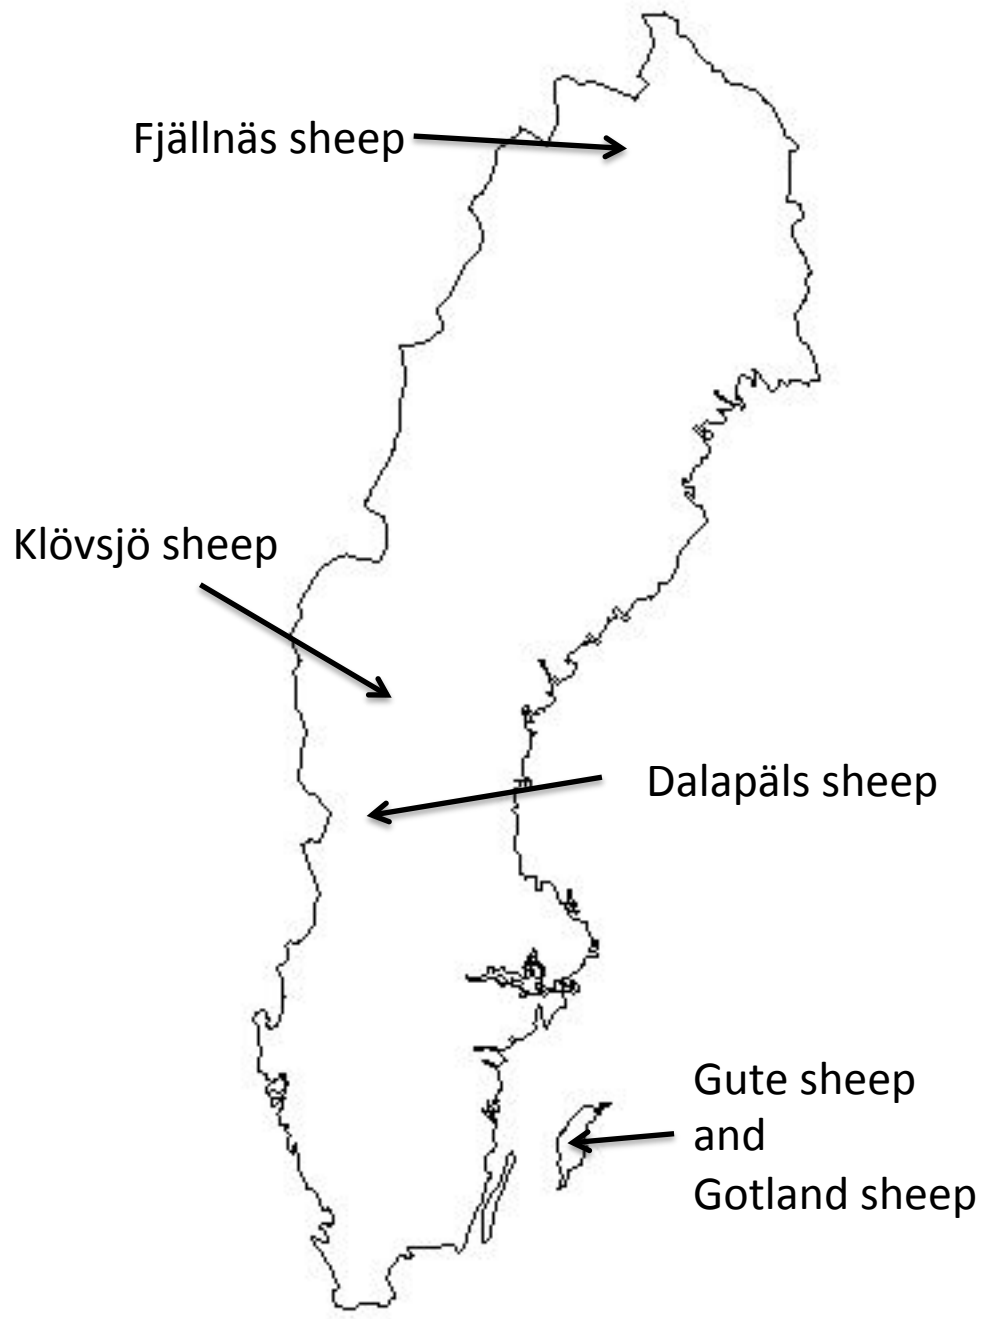

Fjällnäs sheep

Klövsjö sheep

Dalapäls sheep

Gute sheep  
and  
Gotland sheep
